# Supplementary figures and images for: The Association of Serum L-Carnitine Concentrations with the Risk of Cancer in Chinese Adults with Hypertension
Source: MDPI journal article supplement (doi:10.3390/nu14234999), 2022-11-24

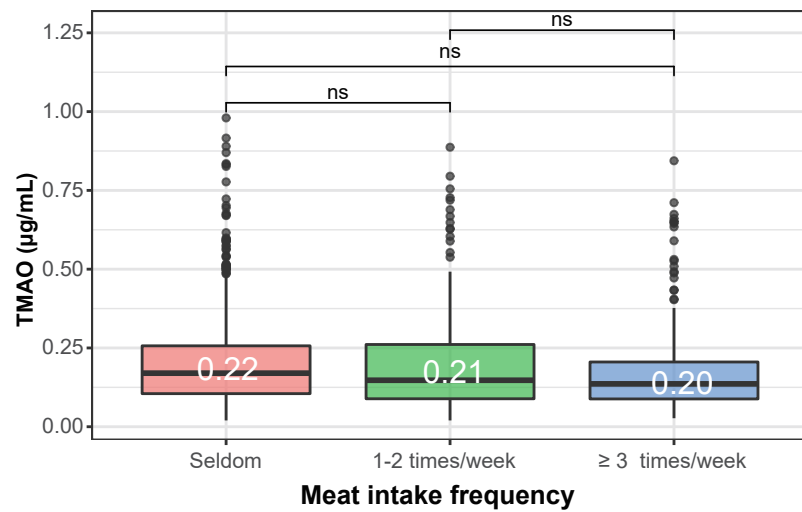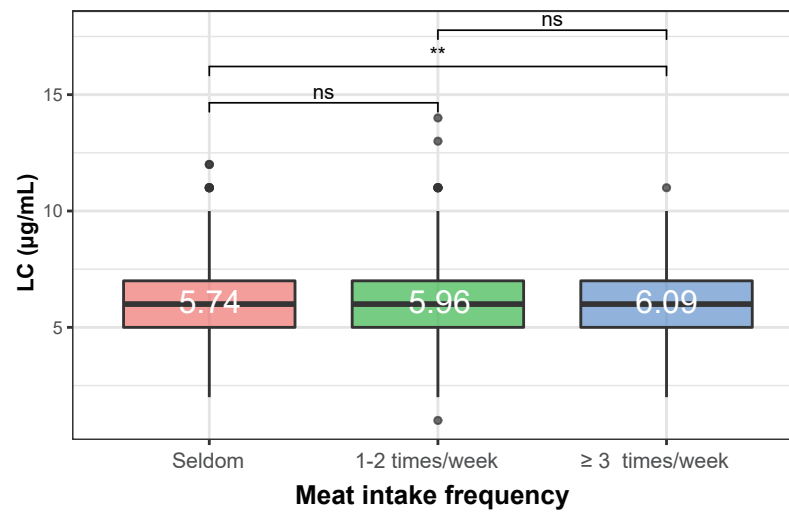

Supplement: s1 [file s1]
